# Supplementary material for: Mesenchymal Stem Cells Alleviate Moderate-to-Severe Psoriasis by Reducing the Production of Type I Interferon (IFN-I) by Plasmacytoid Dendritic Cells (pDCs)
Source: Hindawi journal article supplement (doi:10.1155/2019/6961052), 2019-11-07
Supplement: f1 [file 6961052.f1.pdf]

Supplementary material

S1  
A

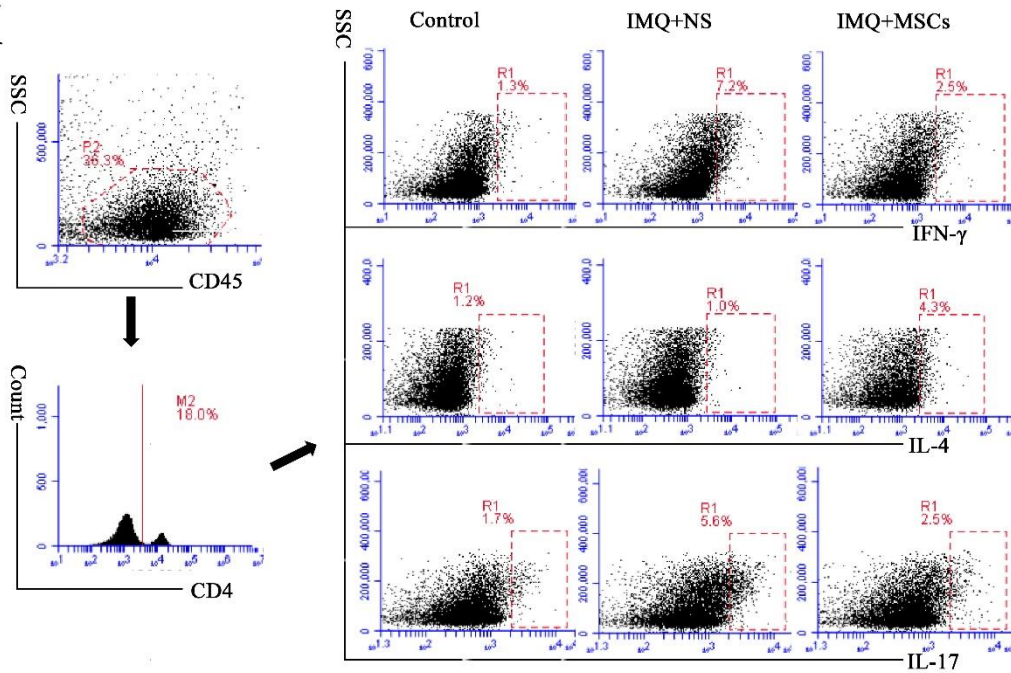

B

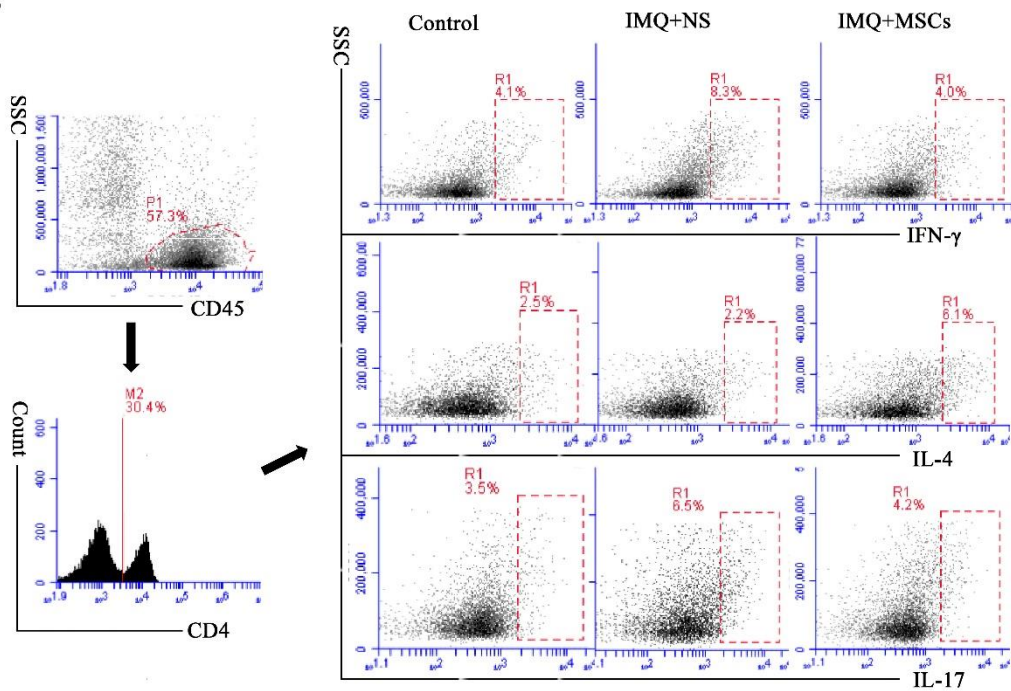

Figure. S1: The gating strategy and representative FACS plots for mice Th1, Th2 and Th17 in spleen(A) and dLN(B) on day 8.-

S2

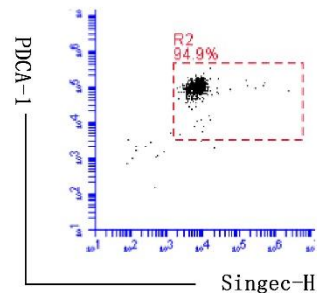

S3

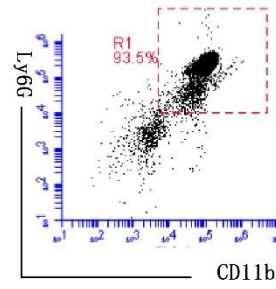

Figure. S2-S3: The **representative FACS plots of purified purity of mouse** splenic pDCs(identified as B220<sup>+</sup>Siglec-H<sup>+</sup>PDCA-1<sup>+</sup>) and neutrophils(identified as CD11b<sup>+</sup>Ly6G<sup>+</sup>) isolated in our experiments.
